# Supplementary material for: Formation of S defects in MoS2-coated wood for high-efficiency seawater desalination
Source: Royal Society of Chemistry journal article supplement (doi:10.1039/d1en00106j), 2021-01-01
Supplement: d1en00106j1.pdf [file d1en00106j1.pdf]

## Supporting Information for Publication

### Formation of S defects in MoS<sub>2</sub>-coated Wood for High-Efficiency Seawater Desalination

#### Authors

Xuan He, Lei Zhang, Xiangang Hu, Qixing Zhou\*

Key Laboratory of Pollution Processes and Environmental Criteria (Ministry of Education)/Tianjin Key Laboratory of Environmental Remediation and Pollution Control, College of Environmental Science and Engineering, Nankai University, Tianjin 300350, China

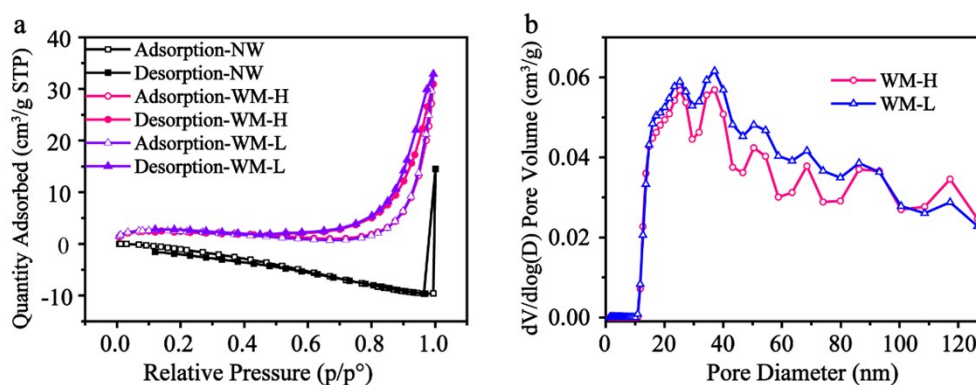

**Fig. S1** Nitrogen adsorption-desorption curves (a) and pore diameter distribution curves (b) of NW, WM-H and WM-L.

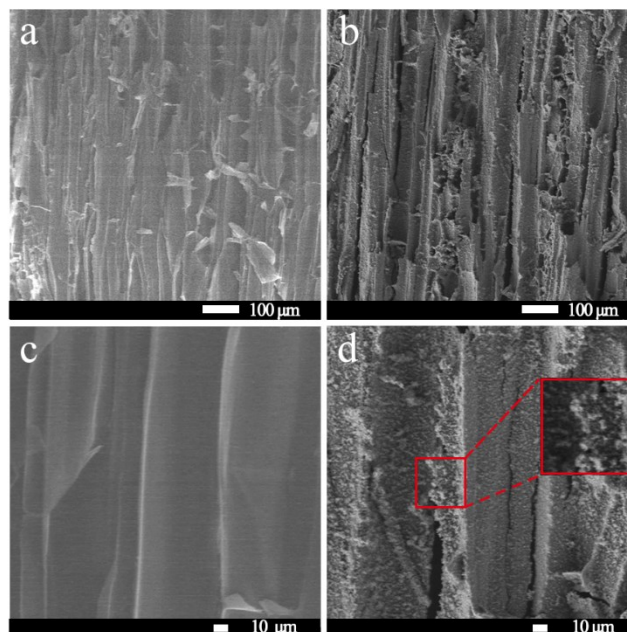

**Fig. S2** SEM images of radial sections of natural wood (NW) (a and c) and MoS<sub>2</sub>-coated wood (WM-H) (b and d).

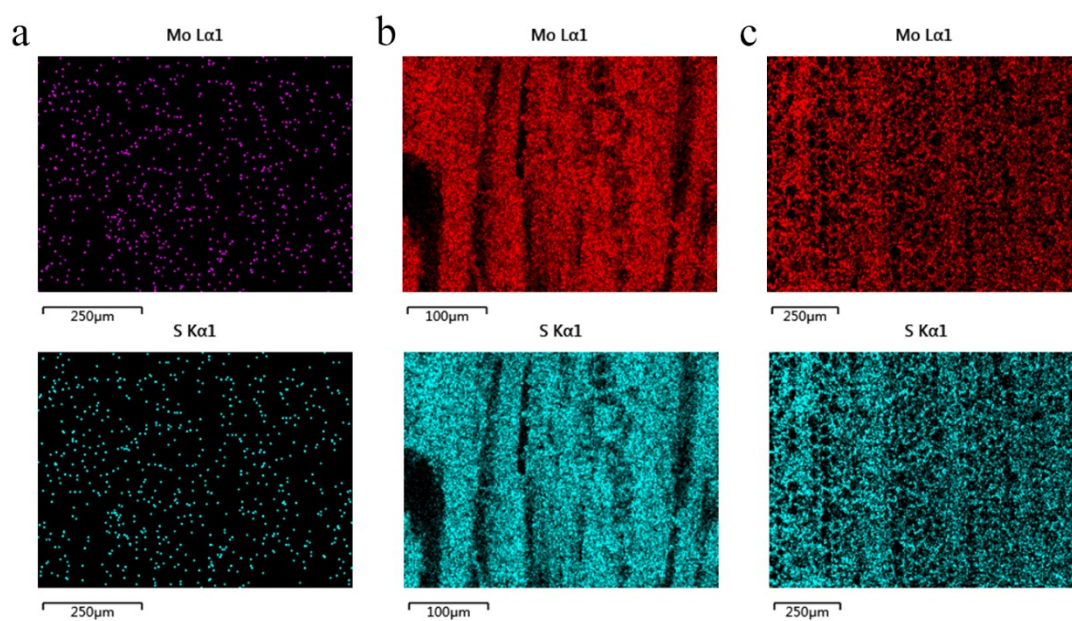

**Fig. S3** Energy dispersive X-ray spectroscopy (EDX) images of NW (a), WM-H (b) and WM-L (c).

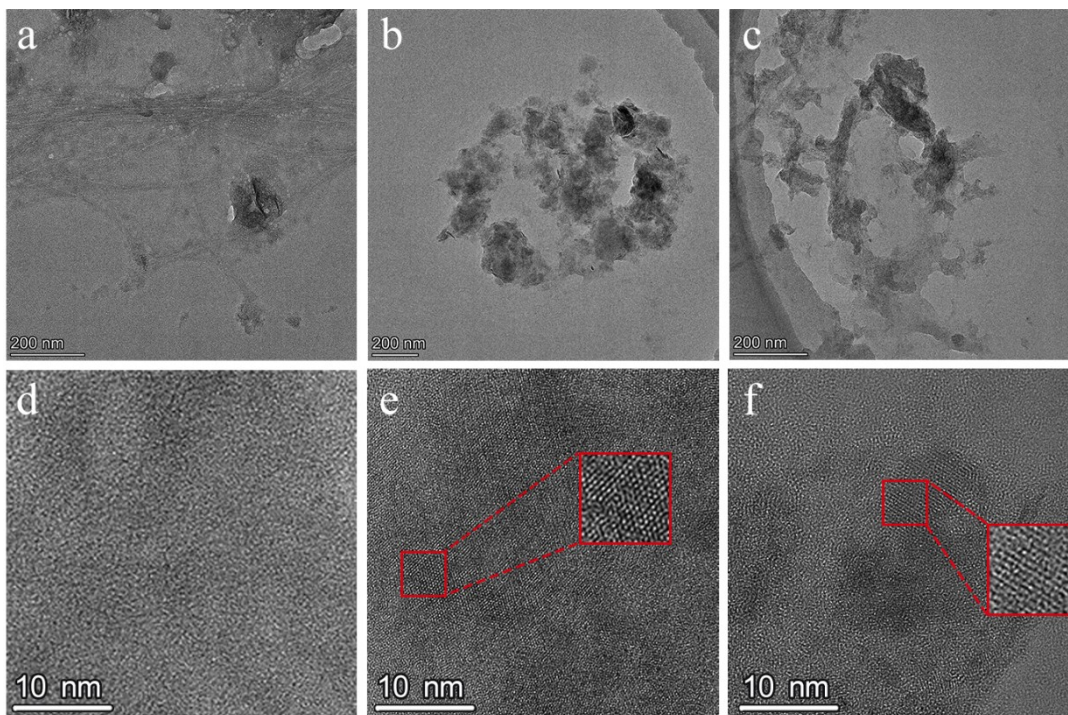

**Fig. S4** Typical TEM and HRTEM images of NW (a and d), WM-H (b and e) and WM-L (c and f).

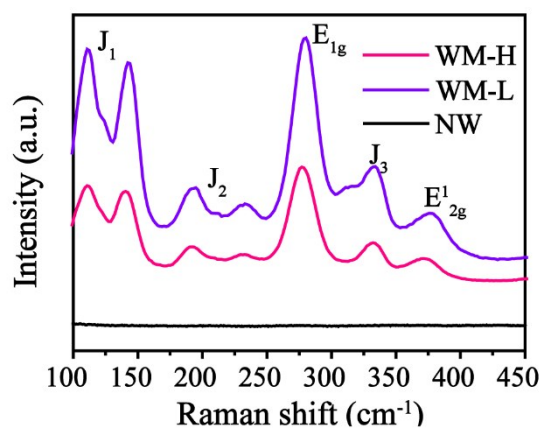

**Fig. S5** Raman spectra of NW, WM-H and WM-L.

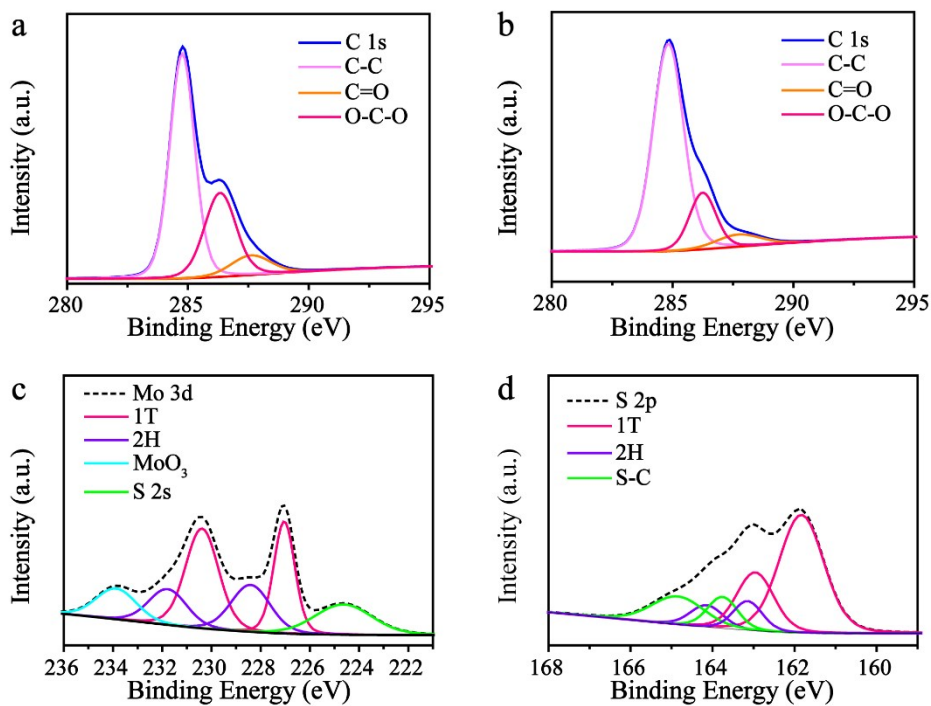

**Fig. S6** (a and b) C 1s spectra of NW and WM-L. (c and d) Mo 3d and S 2s XPS spectra of WM-L.

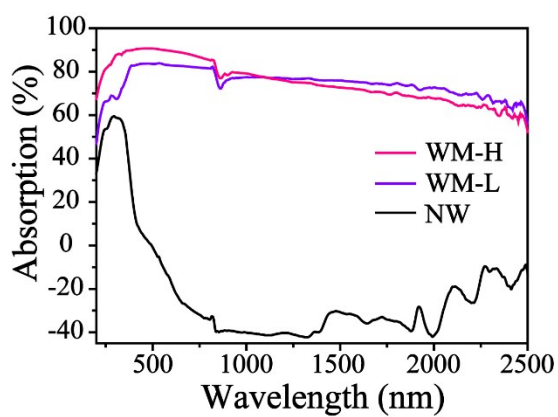

**Fig. S7** Absorption spectra of NW, WM-H and WM-L in the wavelength range of 200 nm to 2,500 nm.

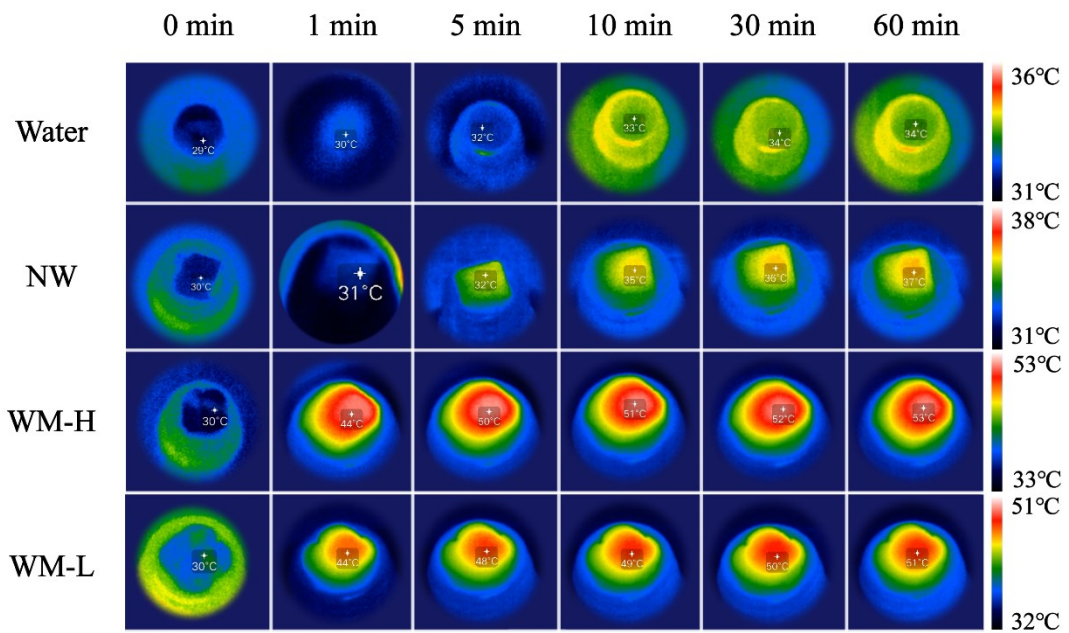

**Fig. S8** Comparison of the surface temperatures of water, NW, WM-H and WM-L floating on water under 1 sun illumination.

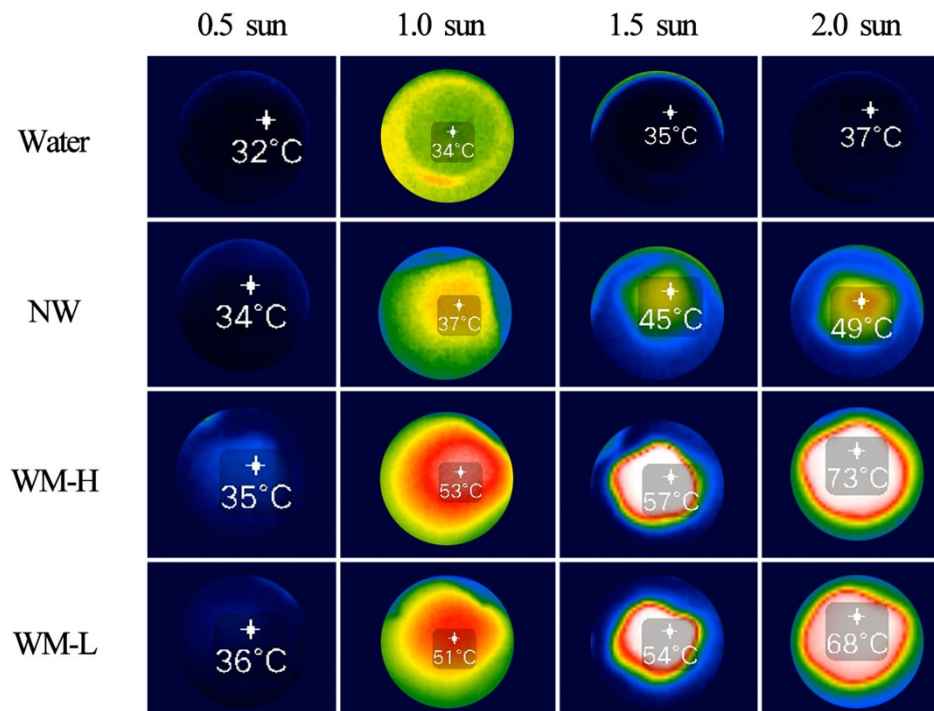

**Fig. S9** Surface temperatures of natural wood, WM-H and WM-L floating on water after 60 min of solar illumination (0.5-2 sun).

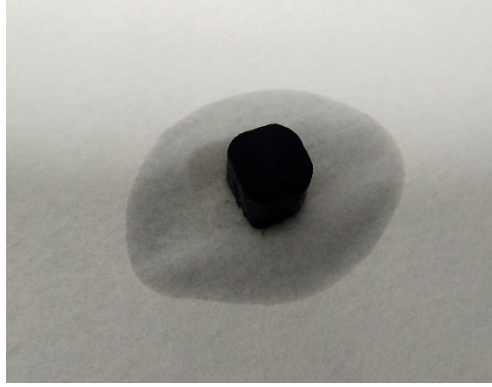

**Fig. S10** Drops of water on the MoS<sub>2</sub>-coated wood can be quickly absorbed.

### Calculation details of the photothermal conversion efficiency

The photothermal conversion efficiency was obtained according to Eq. 1, where the net evaporation rate ( $m$ ) is the evaporation rate of water under light conditions minus the evaporation rate of water under dark conditions.  $h_{LV}$  is calculated according to the

following equations<sup>1, 2</sup>:

$$h_{LV, T_s} = \int_{T_s}^{100^\circ\text{C}} C_{p,l} dT + h_{LV, 100^\circ\text{C}} + \int_{100^\circ\text{C}}^{T_s} C_{p,v} dT$$

$$h_{LV, 100^\circ\text{C}} = 2257 \text{ J} \cdot \text{g}^{-1} \quad (\text{S2})$$

$$C_{p,l} = 4.1813 \text{ J} \cdot \text{K}^{-1} \cdot \text{g}^{-1} \quad (\text{S3})$$

$$C_{p,v} = (3.470 + 1.45 \times 10^{-3} \times T + 0.121 \times 10^5 \times T^{-2}) \cdot R \text{ (J} \cdot \text{K}^{-1} \cdot \text{mol)} \quad (\text{S4})$$

$$R = 8.314 \text{ J} \cdot \text{K}^{-1} \cdot \text{mol} \quad (\text{S5})$$

T is the temperature in Kelvin.

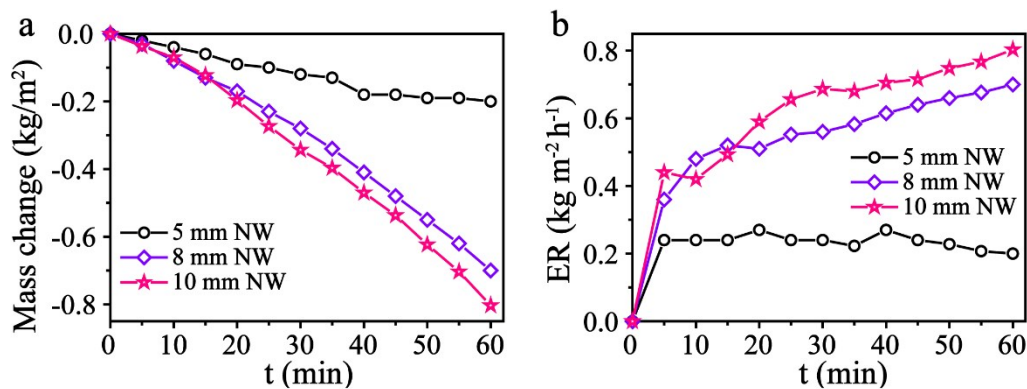

**Fig. S11** Mass changes and water evaporation rates of wood with different thicknesses.

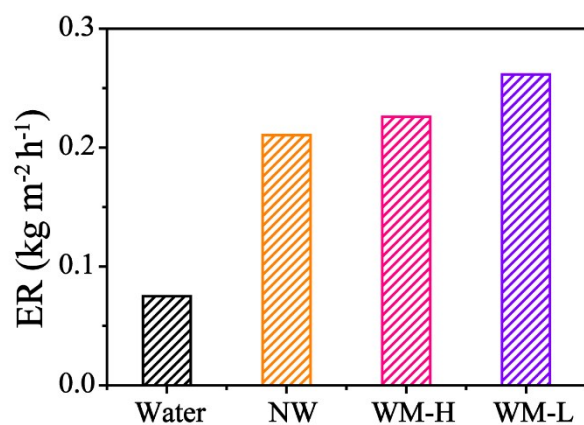

**Fig. S12** Evaporation rates of water, NW, WM-H and WM-L under dark conditions.

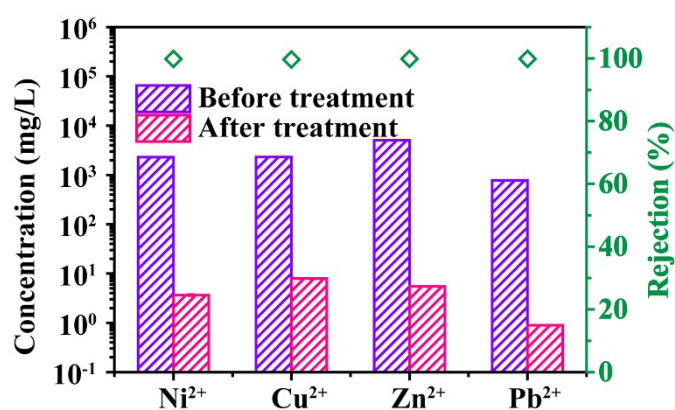

**Fig. S13** Solar thermal purification of Ni<sup>2+</sup>, Cu<sup>2+</sup>, Zn<sup>2+</sup> and Pb<sup>2+</sup> with WM-H in an actual seawater sample under one sun illumination. The actual seawater samples were taken from the Bohai Sea, Tianjin, China.

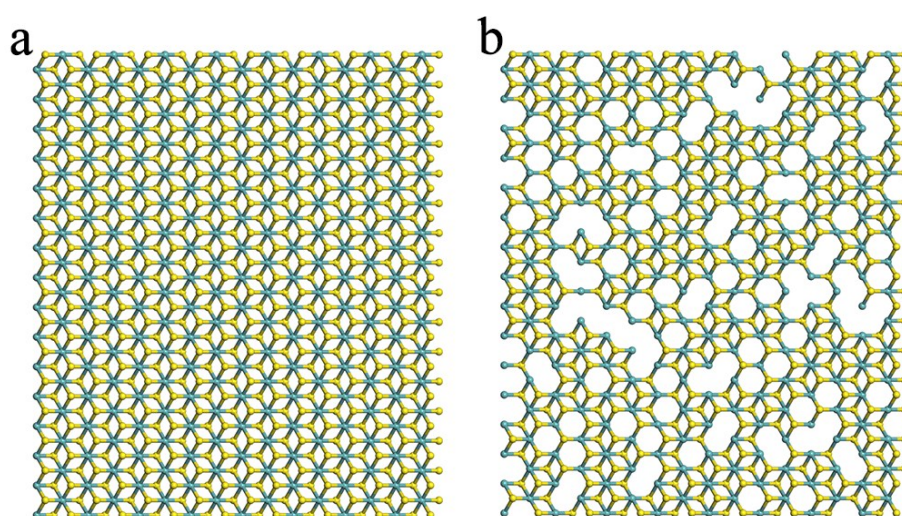

**Fig. S14** Atomic structures of MoS<sub>2</sub> without (a) and with (b) defects.

**References:**

1. W. Li, Z. Li, K. Bertelsmann and D. E. Fan, Portable low-pressure solar steaming-collection unisystem with polypyrrole origamis, *Adv. Mater.*, 2019, **31**, e1900720.
2. M. D. Koretsky, *Engineering and chemical thermodynamics*, Wiley New York, 2004.
